# Supplementary material for: p-Coumaric Acid Enhances Hypothalamic Leptin Signaling and Glucose Homeostasis in Mice via Differential Effects on AMPK Activation
Source: PubMed Central journal article supplement (PMC7867021; doi:10.3390/ijms22031431), 2021-01-31

## Supplementary information

### **p-Coumaric Acid Enhances Hypothalamic Leptin Signaling and Glucose Homeostasis in Mice via Differential Effects on AMPK Activation**

**Linh V. Nguyen <sup>1</sup>, Khoa D.A Nguyen <sup>1</sup>, Chi-Thanh Ma <sup>2</sup>, Quoc-Thai Nguyen <sup>2</sup>, Huong TH. Nguyen <sup>3</sup>, Dong-Joo Yang <sup>4</sup>, Trung Le Tran <sup>4</sup>, Ki Woo Kim <sup>4,\*</sup> and Khanh V. Doan <sup>1,3,\*</sup>**

<sup>1</sup> School of Medicine, Tan Tao University, Duc Hoa, Long An, 850000, Vietnam

<sup>2</sup> Faculty of Pharmacy, University of Medicine and Pharmacy, Ho Chi Minh, 700000, Vietnam

<sup>3</sup> School of Pharmacy, Van Lang University, Ho Chi Minh, 700000, Vietnam

<sup>4</sup> Departments of Oral Biology and Applied Biological Science, BK21 Plus, Yonsei University College of Dentistry, Seoul, 03722, Korea

\*Corresponding authors: Email: kiwoo-kim@yuhs.ac (K.W.K); doankhanh.pharm@gmail.com (K.V.D.)

**A**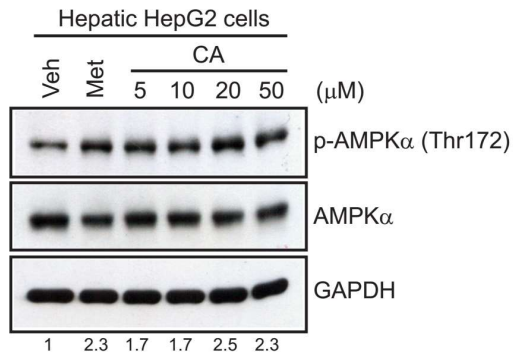**B**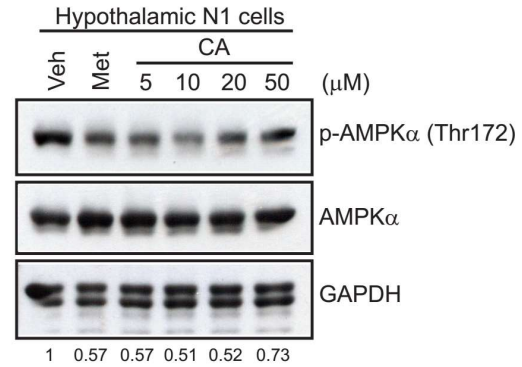

**Figure S1.** Dose-dependent *in vitro* effects of *p*-coumaric acid (CA) treatment on AMPK activation. **(A)** Immunoblots showing dose-dependent effect of CA treatment on AMPK activation in HepG2 cells. **(B)** Immunoblots showing dose-dependent effect of CA treatment on AMPK activation in N1 cells. The digitals at the bottom indicated p-AMPK/AMPK ratios normalized to corresponding GAPDH levels. Veh: vehicle, Met: metformin 2 mM.

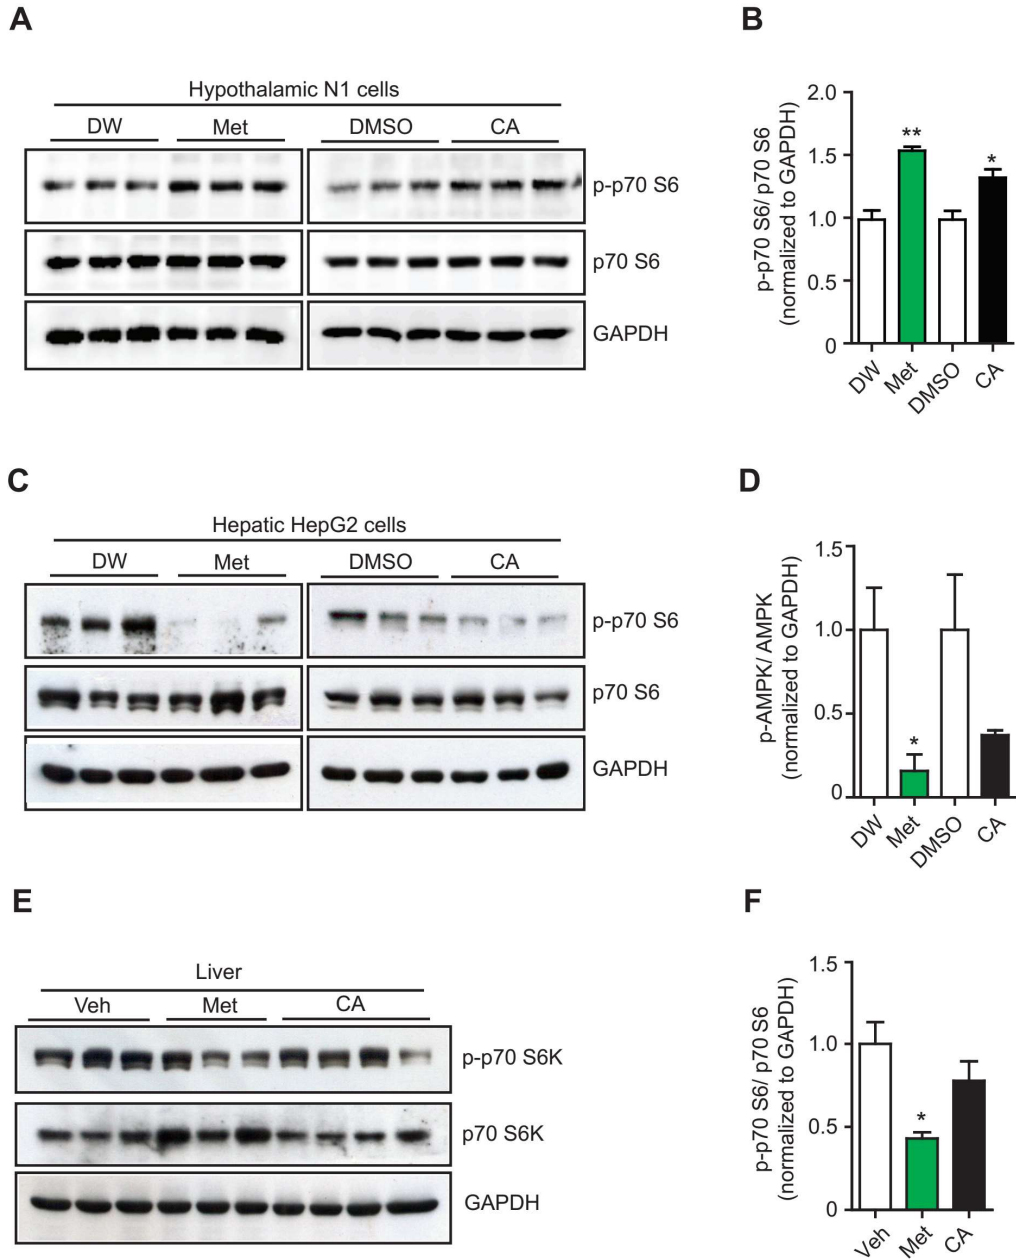

**Figure S2.** Effects of *p*-coumaric acid (CA) treatment on S6 kinase activity. Immunoblots (A) and graph (B) showing levels of p-p70S6 and p70S6 in hypothalamic N1 cells treated with metformin (2 mM) and CA (10  $\mu$ M). Immunoblots (C) and graph (D) showing levels of p-p70S6 and p70S6 in hepatic HepG2 cells treated with metformin (2 mM) and CA (20  $\mu$ M). Immunoblots (E) and graph (F) showing levels of p-p70S6 and p70S6 in livers of mice orally treated with 200 mg/kg of metformin and CA. The results are expressed as mean  $\pm$  SEM. One-way ANOVA with Tukey's post-hoc tests for comparison of multiple groups or Student's t-test. \*P < 0.05, \*\*P < 0.01.

Original blots

Figure 1A

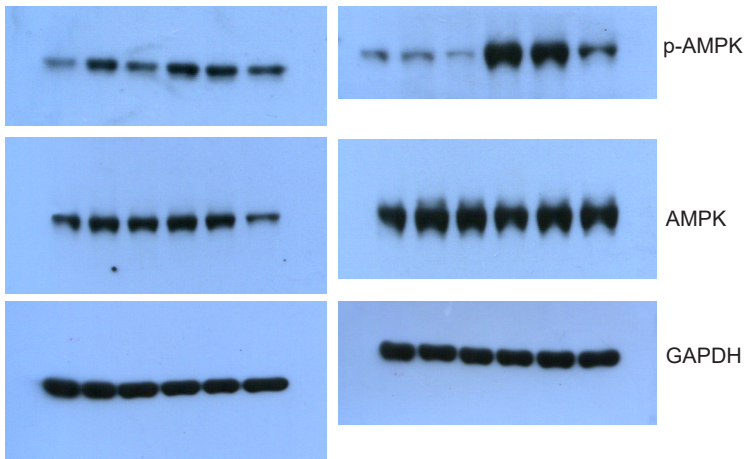

Figure 2A

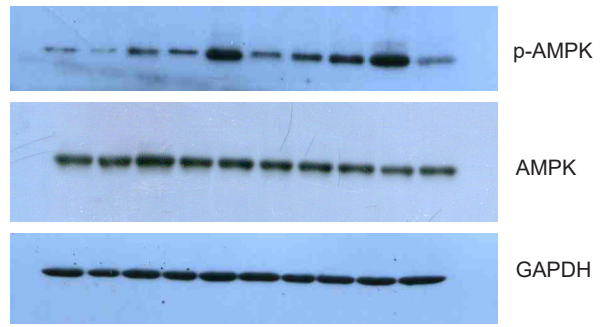

Figure 1C

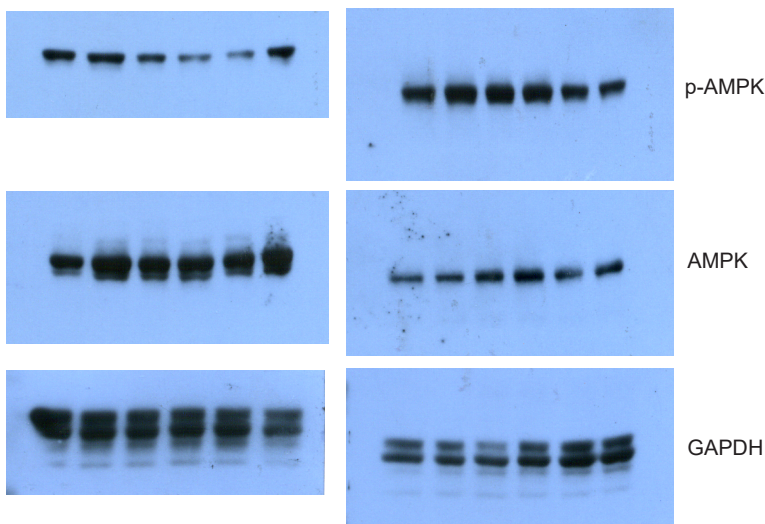

Figure 2C

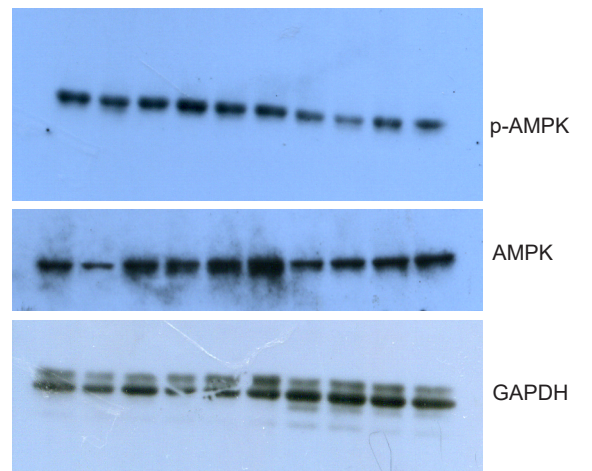

Figure 2E

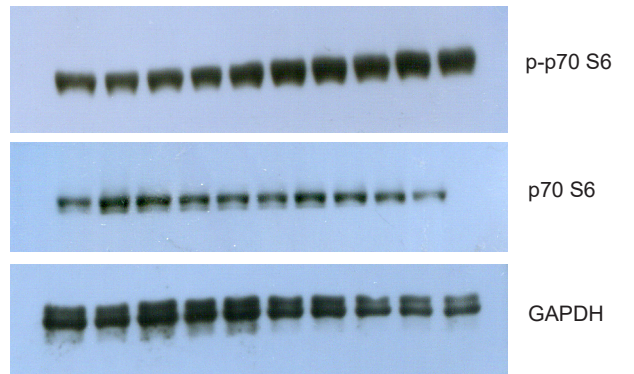

Figure 3B

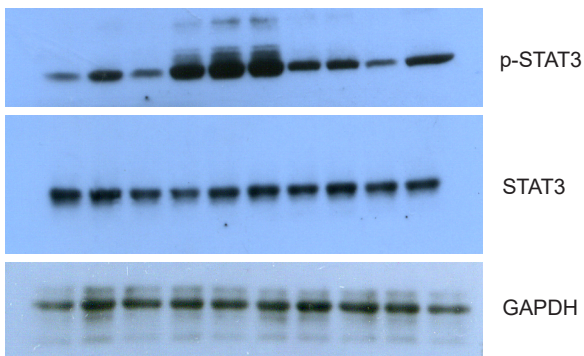



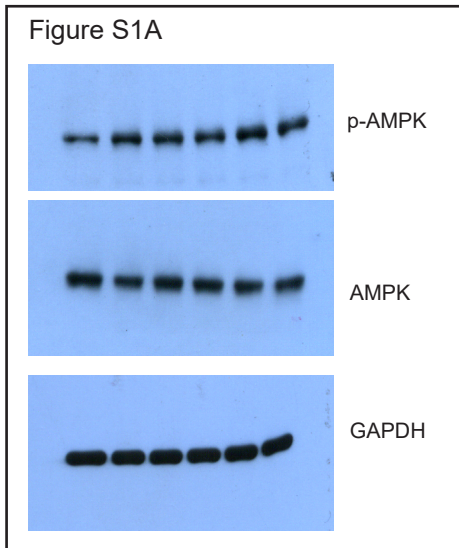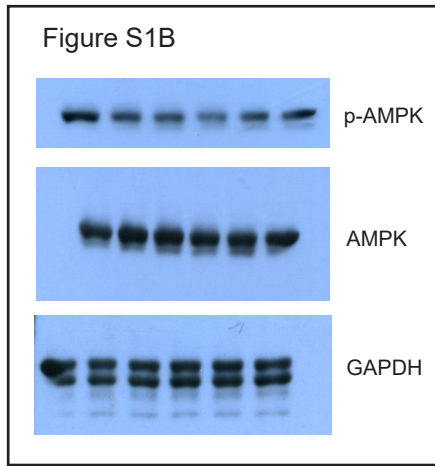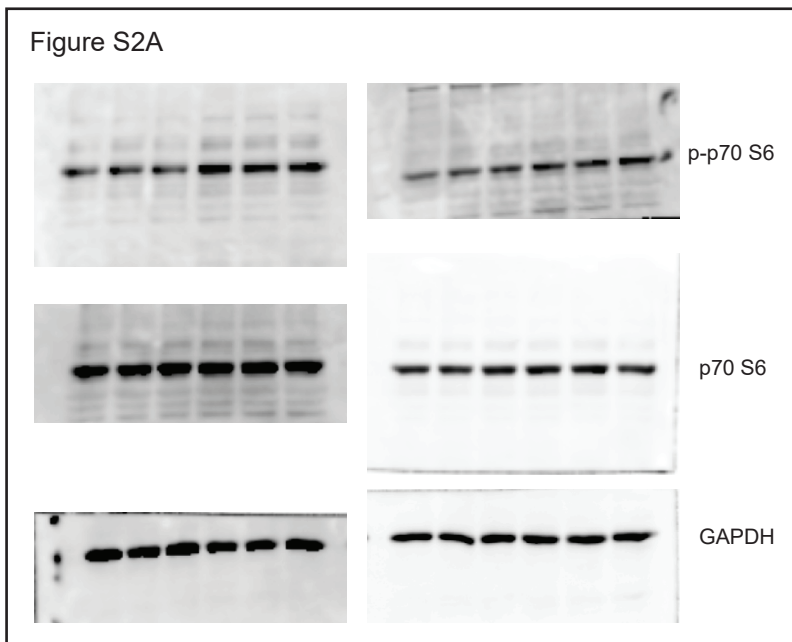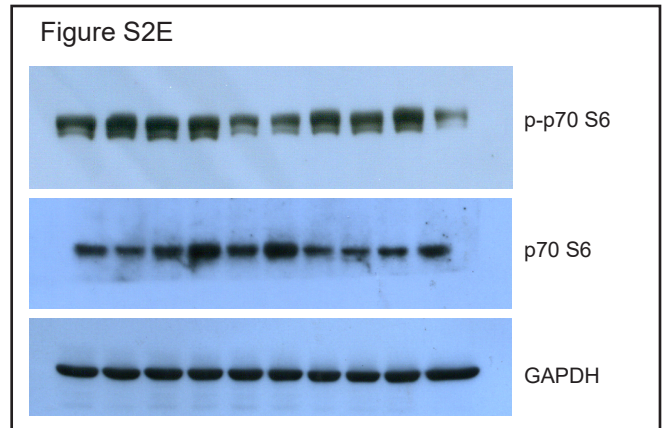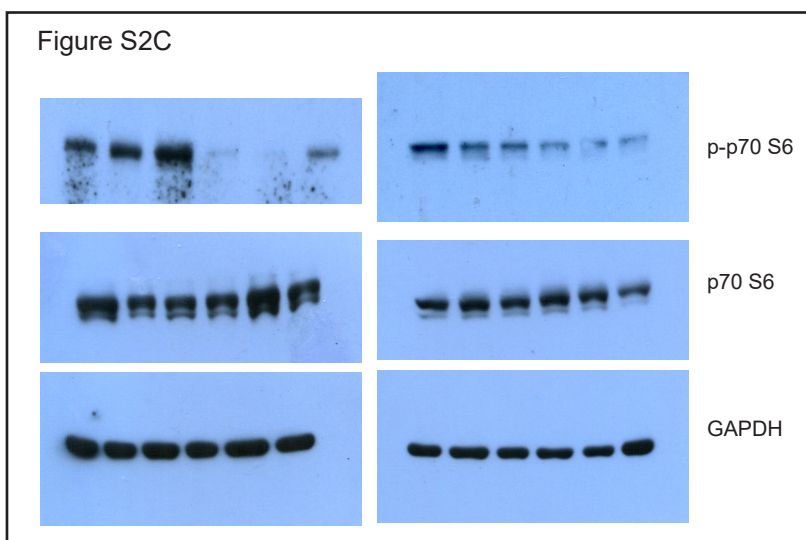

Supplement: ijms-22-01431-s001.pdf [file ijms-22-01431-s001.pdf]
